# Supplementary material for: Proteomic and functional analysis of NCS-1 binding proteins reveals novel signaling pathways required for inner ear development in zebrafish
Source: PubMed Central journal article supplement (PMC2679751; doi:10.1186/1471-2202-10-27), 2009-03-25
Supplement: 1471-2202-10-27-S1.pdf [file 1471-2202-10-27-S1.pdf]

|         |     |                                                              |                                                  |
|---------|-----|--------------------------------------------------------------|--------------------------------------------------|
| h_Arf1  | 1   | MGNIFANLFGKLF                                                | FGKKEMRILMVGLDAAGKTTILYKLLGEIVTTIPTIGFNVETVEYKN  |
| zf_Arf1 | 1   | MGNIFANLFGK-                                                 | VFGKKEMRILMVGLDAAGKTTILYKLLGEIVTTIPTIGFNVETVEYKN |
| h_Arf1  | 61  | ISFTVWDVGGQDKIRPLWRHYFQNTQGLIFVVD                            | SNDRERVNEAREELMRMLAEDELREAV                      |
| zf_Arf1 | 60  | ISFTVWDVGGQDKIRPLWRHYFQNTQGLIFVVD                            | SNDRERVNEAREELMRMLAEDELREAV                      |
| h_Arf1  | 121 | LLVFANKQDLPNAMNAAEITDKLGLHSLRHRNWYIQATCATSGDGLYEGLDWLSNQLRNQ |                                                  |
| zf_Arf1 | 120 | LLVFANKQDLPNAMNAAEITDKLGLHSLRHRNWYIQATCATSGDGLYEGLDWLSNQLK   | NQ                                               |
| h_Arf1  | 181 | K                                                            |                                                  |
| zf_Arf1 | 180 | K                                                            |                                                  |

```
h_Dan      1 ---MLRVLVGAVLPAMLLAAPP-INKLALFPDKSAWCEAKNITQIVGHSGCEAKSIQNR
zf_Dan     1 MVMCVRAVLVCVLLLELSRAAPHAHINRLALFPDKSAWCEAKNITQIVGHTGCTPRSIQNR

h_Dan      57 ACLGQCFSYSVPNTFPQSTESLVHCDSCMPAQSMWEIVTLECPGHEEVPRVDKLVKILH
zf_Dan     61 ACLGQCFSYSVPNTFPQSTESLVHCDSCMPAQIQWEVVTLDCSGSDEAPRVDKLVERILH

h_Dan      117 CSCQACGKEPSHEGLSVYVQGEDGPGSQPGTHPHPHPHPHPGGQTPEPEDPPGAPHTEEE
zf_Dan     121 CSCQSCSKESSQEGALLQLYPHEGAQDLPSLPDATHHPQH AHMQADQD--ADAHLDMH

h_Dan      177 GAED-
zf_Dan     179 APEAG
```

```
h_Hint2      1 -MAAAVVLAAGLRAARRAVAATGVRGGQVRGAAGVTDGNEVAKAQQATP--GGAAPTIFS
zf_Hint2     1 MTACGVLLTRQLLPFGRGLWRVLS----VKSCYSTIN-DEVRLAQEASKKYGKLEPTIFT

h_Hint2      58 RILDKSLPADILYEDQQCLVFRDVAPQAPVHFLVIPKKPIPRISQAEEEDQQLLGHLLLV
zf_Hint2     56 KIIDKTVPAVILYEDDKCLAFRDVNPQAPVHYLVIPRIPIPRISEAHDEDSLILGHLLLV

h_Hint2      118 AKQTAKAEGLDGYRLVINDGKLGQSVYHLHIHVLGGRQLQWPPG
zf_Hint2     116 AKNIAKKEGLAEGYRVVINDGKNGQSVYHLHIHVLGGRQMKWPPG
```

h\_Ip3r 1 -MSEMSSFLHIGDIVSLYAEGSVNGFISTLGLVDDRCVVEPAAAGDLDNPPKKFRDCLFKV  
 zf\_Ip3r 1 MSDSASSFLHIGDIVSLYAEGTVNGFISTLGLVDDRCVVEPASGDLENPPKKFRDCLFKV

h\_Ip3r 60 CPMNRYSAQKQYWKAKQTKQDKEKIADVLLQKLQHAQAQMEQKQNDTENKKVHGDVVVKYG  
 zf\_Ip3r 61 YPMNRYSAQKQFWKAKQAKHEKDKIGDMVLLQKLQHAANLEQKQNDAAENKKVHGDVVVKYG

h\_Ip3r 120 SVIQLLHMKS NKYLTVNKRLPALLEKNAMRVTLDATGNEGSWLFIQPFWKLRSENGDNVVV  
 zf\_Ip3r 121 SVIQLLHMKS NKYLTVNKRLPALLEKNAMRVTLDTGNEGSWLFIQPFWKLRSENGDNVVV

h\_Ip3r 180 GDKVILNPVNAGQPLHASNYELSDNAGCKEVNSVNCNTSWKINLFMQFRDHLEEVLKGGD  
 zf\_Ip3r 181 GDKVILNPVNAGQPLHASSYELPDHSGCKEINSVNSNTSWKISL FMMFSDHKDEV LKGGD

h\_Ip3r 240 VVRLFHAEQEKFLTCDEYKGLKQVFLRRTLQSQSATSATSSNALWEVEVVHHDPCRGGAGH  
 zf\_Ip3r 241 VVRLFHAEQEKFLTCDEYKSKLHVFLRRTLQSQSATSATSSNALWEVEVVHHDPCRGGAGH

h\_Ip3r 300 WNGLYRFKHLATGNYLAAEENPSYKGDASDPKAAGMGAQGRGTGRRNAGEKIKYCLVAVPH  
 zf\_Ip3r 301 WNSLYRFKHLATGNYLAAEENPGYKENSNDIEVGYIVDSSRIKR-SLGERIKYKLVAVPH

h\_Ip3r 360 GNDIASLFELDPTTLQKTDSFVPRNSYVRLRHLCTNTWIQSTNVPIDIEEERPIRLMLGT  
 zf\_Ip3r 360 GNDIASLFELDPTTLQKTDSFVPRNSYVRFRLHLCTNTWIQSTNIPIDIDEERPIRLMLGT

h\_Ip3r 420 CPTKEDKEAFAIVSVPVSEIRDLDFANDASSMLASAVEKLNNEGFISQNDRRFVIQLLEDL  
 zf\_Ip3r 420 CPTKEDKEAFAIVSVPVMEIRDLDFANDASLMLSTVVEKFKYGFLSPNDRRYAIKLLLEDV

h\_Ip3r 480 VFFVSDVFNNGQNVLDIMVTKPNRERQKLMREQNILKQVFGILKAPFREKGGEGPLVRLE  
 zf\_Ip3r 480 VFFVVDQLNNGQPALEVSMNKNRERQKLMREQNILKQIFGIKAPFKERGD DPPLLTLE

h\_Ip3r 540 ELSDQKNAPYQHMFRLCYRVLRHSQEDYRKNQEHIAKQFGMMQSQIGYDILAEDTITALL  
 zf\_Ip3r 540 ELSDQKYLQYMLRLCYRVLRHSQEDYRKNQEYIAKQFGMMQSQIGYDILAEDTITALL

h\_Ip3r 600 HNNRKLLEKHITKTEVETFVSLVRKNREPRFLDYLSDLCVSNHIAIPVTQELICKCVLDP  
 zf\_Ip3r 600 HNNRKLLEKHITKTEVETFVSLVRKNREPRFLDYLSDLCVSNNAIPVTQELICKCVLNA

h\_Ip3r 660 KNSDILIRTELRPVKEMAQSHEYLSIEYSEEEVWLTWTDKNEHHEKSVRQLAQEARAGN  
 zf\_Ip3r 660 KNQDILMKTERRAAKESQHTSEYLEEFGEDEVWLIWSEKENENHEKSIRQLAQEARQGN

h\_Ip3r 720 AHDENVLSYYRYQLKLFARMCLDRQYLAIDEISQQLGVDLIFLCMADEMLPFDLRASFCH  
 zf\_Ip3r 720 VHDENVLTYRYRYQLKLFARMCFDRQYLAIDVISKQLDIELISLCMMDETLPFDLRASFCR

h\_Ip3r 780 LMLHVHVDVDRDPQELVTPVKFARLWTEIPTAITTIKDYDSNLNASRDDKKNKFANTMEFVED  
 zf\_Ip3r 780 LMLHAHVDRDPQELVTPIKFARLWTEIPTSISIKDYDSHLDYSRDNKKNKFANTMAFMEE

h\_Ip3r 840 YLNNVVSEAVPFANEKKNKLTFEVVS LAHNL IYFGFYSFS ELLRLTRTLLGIIDCVQGP  
 zf\_Ip3r 840 YLNNVLIDDLPFANEKKNKLTIEVVS LARHL IYFGFYSFF ELLRLTRTLLGIIDCTPSNA

h\_Ip3r 900 AMLQAYEDPGGKNVRRSIQGVGHMMSTMVLSRKQSVFSAPSLSAGASAAEPLDRSKFEEN  
 zf\_Ip3r 900 SINPLFNDGSKNVRRSIHGMMQMMSTMVLRKPSLFSAP----GRTGDSQVGSKDSIDT

h\_Ip3r 960 EDIVVMEETKLEKILEILQFILNVRLDYRISYLLSVFKKEFVEVFPMDSGADGTAPAFDST  
 zf\_Ip3r 956 QDITVMDTKLEKILEILQFILSVRLDYRISFLLSVFKKEFVDVYPMEDADAT-HHTEHEGN

h\_Ip3r 1020 TANMNLDRIGEQAAMFGVVGKTS SMLLEV DDEGGRMFLRVL IHLTMHDYAPLVSGALQLLF  
 zf\_Ip3r 1015 RSSINLQHIIGEQAAMFGIGKNS ILEV DDEGGRMFLRVL IHLIMHDYAPLVSGALQLLF

h\_Ip3r 1080 KHFSQRQEAAMHTFKQVQLLISAQDVENYKVIKSELDRLRMTMVEKSELWVDKKGSGKGEV  
 zf\_Ip3r 1075 KHFSQRQEVLHTFKQVQLLISTQDV DNYKH IKRDLDLRMTMVEKSELWVIKKS SSGDGK

h\_Ip3r 1140 EAGAAKDKKE----RPTDEEGFLHPPGEEKSSENYQIVKGI LERLNKMC GVG EQMRKKQOR  
 zf\_Ip3r 1135 KD--KKDKKEPEAVSPEEEADSKQTTEKS NESYQNVKE I LERLNKMCSSG--VFKKQOR

h\_Ip3r 1196 LLKNMDAHKVMLDLLQIPYDKGDAKMM EILRYTHQFLQKFCAGNPGNQALLHKHLHFLFT  
 zf\_Ip3r 1191 LLKNMGAHKVMLDLLQISYDRNDTKMLEIKYTHLFLQKCTGNLENQALLHKHLNLFLLT

h\_Ip3r 1256 PGLLEAETMQHIFLN NYQLCSEISEPVLQHFVHLLATHGRHVQYLDLFLHTVIKAEGKYVK  
 zf\_Ip3r 1251 PRLLEAETMQQIFSN NFQLCSEISESVLHHFIHCLATQGRHIQYLNFLHTI IKAEGKYVK

h\_Ip3r 1316 KCQDMIMTEL TNAGDDVVVFYNDKASLAHLLDMMKAARDGVEDHSPLMYHISLVDLLAAC  
 zf\_Ip3r 1311 KCQDMIMTELTSAGDDVVVLYTDDTSFNTMVELMTQSREGVKDDSP LRYHISLVELLAAC

h\_Ip3r 1376 AEGKNVYTEIKCTSLPLEDVVS VVTHEDCITEVKMAYVNFVNHCYVDTEVEMKEIYTSN  
 zf\_Ip3r 1371 AEGKNVYTEIKCTSLPLEEMVKVI THEDCITEVKIAYVNFVNHCYVDTEVEMKEIYTSN

h\_Ip3r 1436 HIWTLFENFTLDMARVCSKREKRVADPTLEKYVLSVVLDTIN AFFSSPFSENSTSLQTHQ  
 zf\_Ip3r 1431 HIWKLFENFTVDMARVCSNREKRMSDPVLEKYVIQVVLDTVT AFFSSPFSENSTSTEAAH

h\_Ip3r 1496 TIVVQLLQSTTRLLECPWLQOQHKG SVEACIRTLAMVAKGRAILLPMDLDAHISSMLSSG  
 zf\_Ip3r 1491 TTVKQLLQSTMRLLD CPWLQPOQKVQVES CIRTLAVTTKSRSIPLPVELEAHVNMMLS--

h\_Ip3r 1556 ASCAAAQRNASSYKAT TRAFPRVTP TANQWDYKNIIEKLQDIITALEERLKPLVQAELS  
 zf\_Ip3r 1549 HSNLTLRSSSHNSKMSRLTRPAAPT N-PWDYKNIIEKLQDIINTLEERVMLPVNAELS

h\_Ip3r 1616 VLVDVLHWPPELLFLEGSEAYQRCE SGGFLSKLIQHTKDLMESEKLCIKVLRTLQOMLLK  
 zf\_Ip3r 1608 VLVDVLHQPELLFLEGTDARSRCESGGFISKLIQHTKALMNSDEKLCIKVLRTLQOEMLR

h\_Ip3r 1676 KTKYGD~~DRGNQLRKMLLQNYLQNRKSTSRGDLDPDPIGTGLDPDWSAIAATQCRLDKEGATK~~  
 zf\_Ip3r 1668 ELDF~~DEKGFALRKVLLQNYLYNNKKNIKAELVEHAGEG-ERD~~WLTVAAL~~QCRLDKEGGTK~~

h\_Ip3r 1736 LVC~~DLITSTKNEKIFQESI~~GLAI~~HLLDGGNTEIQKSFHNLMMSSDKKSERFFKVLH~~DRMKR  
 zf\_Ip3r 1727 LFT~~DLITSTKNEKIFQESIQLAICLLEGGNTEIQNSFYKLMMGDNKSEKFFKVLNDRMKN~~

h\_Ip3r 1796 AQQE~~TKSTVAVNMMDLGSQPHE~~DREPV~~DPTTKGRVASFSIPGSSSRYSLGP~~SLRRGHEVS  
 zf\_Ip3r 1787 AQL~~DIKSTVSVNVGEMSNKAKDDK~~---DLET~~GNRNNNFPSGGVSSFGQPEP~~-----QPE

h\_Ip3r 1856 ERVQS~~SEMGTSVLI~~MQ~~PILRFLQLLCENHNRDLQNFLRCQNNKTNYNLVCE~~TLQFLDIMC  
 zf\_Ip3r 1838 QQEVE~~TEMGPSVTIMK~~PILRFLQLLCENH~~NQDLQNFLRIQNNKTNYNLVSE~~TLQFLDIMC

h\_Ip3r 1916 G~~STTGGLGLLGLYINEDNVGLVI~~QTLET~~LTTEYCOGPCHE~~NQTCIV~~THE~~SN~~GIDIITALIL~~  
 zf\_Ip3r 1898 G~~STTGGLGLLGLYINENNVELIT~~QTLET~~LTTEYCOGPC~~QENQTCIV~~SHE~~CN~~GIDIITALIL~~

h\_Ip3r 1976 NDISP~~LCKYRMDLVLQLKDNASKLLALMESRHDS~~ENAERIL~~ISLRPQELVDVI~~KKAYLQ  
 zf\_Ip3r 1958 NDISP~~LCRYRMEI~~VLQLKDNASKLLALMESRHDS~~ENAERILFNL~~PREL~~VELI~~KKAYLQ

h\_Ip3r 2036 EEE~~RENS~~EVS~~PREVGHNIYILALQLSRH~~NKQL~~QHLLKPVKRIQ~~EEEE~~AEGTSSMLS~~LNNKQ  
 zf\_Ip3r 2018 EGE~~CKEG~~EVS~~PREVGHNIYILALQLAR~~HNKVLL~~TLLKPVKRIKE~~EEEE~~EESTSSMLN~~LNNKQ

h\_Ip3r 2096 LSQML~~KSSAPAQ~~EEEE~~DPLAYYENHTS~~QIEIVR~~QDRSMEQIVFPVPGICQ~~FLTEET~~TKHRL~~  
 zf\_Ip3r 2078 E-----E~~EKEDPLEHYDRQTAQ~~IEIVR~~EDRSMEQIVFPVHPICE~~FLTEES~~SKFRV~~

h\_Ip3r 2156 FTTTE~~QDEQGSKVS~~DFFD~~QSSFLHNEMEWQR~~KLRSMPLI~~YWF~~SRRM~~TLWGSIS~~FNLA~~VFI~~  
 zf\_Ip3r 2127 FTTTE~~QDEQGSKVTN~~FFE~~QTSFLHNEMEWQ~~KLRSM~~PVLYWF~~SRRM~~SLWGTIS~~FNLA~~VFI~~

h\_Ip3r 2216 NIIIA~~FFYPYMEGASTGVLDSPLISLLFW~~ILICFS~~IAALFTK~~RY~~SIRPLIVALILRS~~IYY  
 zf\_Ip3r 2187 NLLIAL~~FYPHDSGHS-GS~~IDSS~~LLLMGF~~WCFAGLAVL~~GLLFKRYGFQSLTVAITL~~R~~CIYH~~

h\_Ip3r 2276 LGIG~~PTLN~~ILGALN~~LTKNIVFVVSFVGNR~~GTFIR~~GYKAMVMDMEFLYHVGYILTSV~~LGLF  
 zf\_Ip3r 2246 FGIG~~PTL~~LLGALN~~LTKNIVYLVSFVGN~~NGTFIM~~GYKAMVMDVEFLYHVAYVLTSS~~LGLF

h\_Ip3r 2336 AHE~~L~~FYSILL~~FDLIYREETF~~FNVIK~~SVTRNGRSILLTALLALILVYL~~F~~SIVGFLFLK~~DDF  
 zf\_Ip3r 2306 VHE~~F~~FYSILL~~FDLIYREETF~~FNVIK~~SVTRNGRSILLTAVLAILILVYL~~F~~SIVGFLFLR~~NDF

h\_Ip3r 2396 ILE~~VDR~~LPNNH~~STASPLGMPHGAAAFV~~DTCSG~~DKMDCV~~SGLS~~VPEVLEEDREL~~D~~STERAC~~  
 zf\_Ip3r 2366 IME~~V~~DHLAS-----PAP~~GD~~TES~~FMSS~~CS~~SDG~~IDC~~TEETGL~~LAPAE~~EDE~~---D~~NTERAC~~

h\_Ip3r 2456 D~~TLLMCIVTVMNHGLRN~~GGGV~~GDILRKPSKDE~~S~~LFPARVVYD~~LLFF~~FIVIII~~V~~LNLI~~FGV  
 zf\_Ip3r 2416 D~~TLLMCII~~TVL~~NHGLRN~~GGGV~~GDVLRKPSKNE~~P~~LFPARVVYD~~LLFF~~FIVIII~~V~~LNLI~~FGV

h\_Ip3r 2516 IIDTFADLRSEKQKKEEILKTTTCFICGLERDKFDNKTVSFEEHIKLEHNMWNYLYFIVLV  
zf\_Ip3r 2476 IIDTFADLRSEKQKKEEVLKTTTCFICGLERDKFDNKTVSFEEHIKLEHNIWNYLYFIVLI

h\_Ip3r 2576 RVKKNKTDYTGPEYSVAQMIKKNKLDWFPRMRAMSLVSNEGEGEQNEIRILQDKLNSTMKL  
zf\_Ip3r 2536 REKKNKTDYTGPEYSVALMIKKNKLDWFPRMQAMSLVVTDGDGEQNEMRNLQDRLSSTMKV

h\_Ip3r 2636 VSHLTAQLNELKEQMTEQRKRRQRLGFVDVQNCISR-----  
zf\_Ip3r 2596 VTQLTSQLTELKEQMTEQRKRRQRMGFVDVQSGSNPGMPVPPSPAGGNQVYKA

h\_Pi4kb 1 -----MRFLEARSLAVAMGDTVVEPAPLKPTSEP---TSGPPGNNGGS-----LLS  
 zf\_Pi4kb 1 MGDTELELSPTHLEELQKSPSTSTTSSLSLSPSSSPSSGPHPLTSSSPSTSEGLPTSSPPLD

h\_Pi4kb 44 VITEGVGELS-VIDPEVAQKACQEVLEKVKLLHGGVAVSSRGTPLELVNGDGVDSIIRCL  
 zf\_Pi4kb 61 VISEGLGELSLVIDTEVAKKACQEVLEKVKFLKGDGEVSSASSEPIILANG-TAHPEANDG

h\_Pi4kb 103 DDPPAQIREEEDMGAAVASGTAKGARRRRQNNNAKQSWLLRLFESKLFDISMAISYLYN  
 zf\_Pi4kb 120 GQPP-KISEEEVEP-----IKSVRRRQKNNSKQSWLLRLFESKLFDISMAISYLYN

h\_Pi4kb 163 SKEPGVQAYIGNRLFCEFRNEDVDFYLPQLLNMYIHMDDEDVGDIAKPYIVHRCRQSINFSL  
 zf\_Pi4kb 171 SKEPGVQAYIGNRFLSFRNEDVDFYLPQLLNMYIHMDDEDVGDIAKPYVIVYRRCRQSINFSL

h\_Pi4kb 223 QCALLLGAYSSDMHISTQRHSRGTCLRKLILSDELKPAHR--KRELPSLSP-----  
 zf\_Pi4kb 231 QCAWLLGAYSSDMHISTQRHSRGTCLRKLILSDELKPSQRIRREVPPPPPPYPPPLHHG

h\_Pi4kb 272 --APDTGLSPSKRTHQRSKSDATASISLSSNLKRTASNPKVENEDDELSSSTESIDNSFS  
 zf\_Pi4kb 291 PGMSEHSLSPSKRTHQRSKSDATVSISSNLKRTASNPKVETSQDELSEFPLS--TSFLS

h\_Pi4kb 330 SPVRLAPEREFIKSLMAGIKRLATLPTKEQKTQRLISELSLLNHKLPARVWLPTAGFDHH  
 zf\_Pi4kb 349 QPVRLTPQREFIKSLMGIKRLATLPTKEQKTQRLISELSLLNHKLPARVWLPTAAFDHH

h\_Pi4kb 390 VVRVPHTQAVVLNSKDKAPYLIYVEVLECFDFTTSVPARIPENRIRSTRSVENLPCGI  
 zf\_Pi4kb 409 VVRVPHTQAVVLNSKDKAPYLIYVEVLECFEFTSSVPVRIPETQIRSTRSVENLPCGI

h\_Pi4kb 450 THEQRAGSFSTVPNYDNDDEAWSVDDIGELQVELPEVHTNSCDNISQFSVDSITSQESKE  
 zf\_Pi4kb 469 TPDQRASSFSTVPNYDNDDEAWSVDDIGELQVELPEIHTNSCDNISQFSVDSITSQESKE

h\_Pi4kb 510 PVFIAAGDIRRRLSEQLAHTPTAFKRDPEPDSAVALKEPWQEKVRRIREGSPYGHLPNWR  
 zf\_Pi4kb 529 PIFIAAGDIRRRLSEQLAHTPTTFKRDPEPDSAVALKEPWQEKVRRIREGSPYGHLPNWR

h\_Pi4kb 570 LLSVIVKCGDDLQELLAFQVLKQLQSIWEQERVPLWIKPYKILVISADSGMIEPVVNAV  
 zf\_Pi4kb 589 LLSVIVKCGDDLQELLAYQVLKQLQIWEQERVPLWIKPYKILVISDSGMIEPVVNAV

h\_Pi4kb 630 SIHQVKKQSLSLLDYFLQEHGSYTTEAFLSAQRNFVQSCAGYCLVYLLQVKDRHNGNI  
 zf\_Pi4kb 649 SIHQVKKQSLLLDDYFRQEHGNFNTEEFLTAQRNFVQSCAGYCLVYLLQVKDRHNGNI

h\_Pi4kb 690 LLDAEGHIIHIDFGFILSSSPRNLFGETSAFKLTTEFVDVMGGLDGDGMFNYYKMLMLQGL  
 zf\_Pi4kb 709 LLDSEGHIIHIDFGFILSSSPRNLFGETSAFKLTSEFVDVMGGLDGDGMFNYYKMLMLQGL

h\_Pi4kb 750 IAARKHMDKVVQIVEIMQOGSQLPCFHGSSTIRNLKERFHMSMTEEQLQLLVEQMVDGSM  
 zf\_Pi4kb 769 IAARKHMEKVIQIVEIMQOGSQLPCFHGSSTIRNLKERFHMLNTEEQLQVLVEQMVDGSM



```
h_Pi4kb 810 RSITTKLYDGFQYLTNGIM-----  
zf_Pi4kb 829 RSITTKLYDGFQYLTNGIMDEEDSLILGHLLVVAKNIAKKEGLAEGYRVVINDGKNGAQS  
  
h_Pi4kb -----  
zf_Pi4kb 889 YHLHIHVLGGRQMKWPPG
```

```

h_Pink1      1 MAVRQALGRGLQLGRALLLRFTGKPGRAYGLGRPGPAAGCVRGERPGWAAGPGAEPRRVG
zf_Pink1     1 MSVKHVLRSRGLLEGRSVFQLGLLKP-----AGRVAAKFRGER--LRVSRPTRTVQPQ

h_Pink1     61 LGLPNRLRFFRQSVAGLAARLQRQFVVRWGCAGPCGRAVFLAFGLGLGLIEEKQAESRR
zf_Pink1    51 TFLPGRYRFFRLSVSGLAAQLQSGAFRRVIGGGSARNRAVFLAFGVGLGLIEQEQEEDRT

h_Pink1    121 AVSACQEIQAIFFTQK-SKPGPDPLDTRRLQGFRL E EYLIGQSIGKGC SAAYEATMPTLP
zf_Pink1   111 SAALCQEIQAVFRKKKFSLSLKPFTS----GYRLEDYVIGKQIGKGCNAAYEAAAPFAP

h_Pink1    180 QNLEVTKSTGLLPGRGPGTSAPGEGQERAPGAPAFPLAIKMMWNISAGSSSEAILNTMSQ
zf_Pink1   167 PVESKKSLSVELNPKAEEDDNKKEEPLRLSASPSFPLAMKMMWNIAGSSSDAILRSM SM

h_Pink1    240 ELVPASRVALAGEYGAVTYR-KSKRGPQQLAPHPNITIRVLRRAFTSSVPLLPGALVDYPDV
zf_Pink1   227 ELVPSCPQALRKEQGEITLNGHFGAVPKRLSAHPNVITVYRAFTAEVPLLPGAREEYPDV

h_Pink1    299 LPSRLHPEGLGHGRTLFLVMKNYPCTLRQYLCVNTPSPRLAAMMLLQLLEGVDHLVQQGI
zf_Pink1   287 LPARLNPHGLGSRNRTLFLVMKNYPCTLRQYLEVCVPKRTQASIMFLQLLEGVDHLCRQNI

h_Pink1    359 AHRDLKSDNILELDPDGCPWLVIADFGCCLADESIGLQLPFSSWYVDRGGNGCLMAPEV
zf_Pink1   347 AHRDLKSDNILLEFDNTGCPRLVITDFGCCLAEDS-GLKLPFSSWVNRGGNSCLMAPEV

h_Pink1    419 STARPGPRAVIDYSKADAWAVGAIAYEIFGLVNPFGQGKAHLESRSYQEAQLPALPESV
zf_Pink1   406 STAVPGPGVVVIDYSKADVAVGAIAYELFGQPNPFY-----TLESRSYQEKQLPALPAAA

h_Pink1    479 PPDVRQLVRRALLQREASKRPSARVAANVLHLSLWGEHILA-LKKNLKLDKMVGWLLQQSAA
zf_Pink1   461 PDDVQLVVKLLLRKNPHKRPSARVAANILHISLWGRVLAGLQVQMAEMMAWLQCSAV

h_Pink1    538 TLLANRLTEKCCVETKMKMLFLANLE CETLCQAALLLCS----WRAAL-----
zf_Pink1   521 VLLKGRGRDQSSVEAELQRSFLANIELEDLRTAVSFLTYERKQWRYLLMSNSQP

```

|             |     |                                                                                                                         |
|-------------|-----|-------------------------------------------------------------------------------------------------------------------------|
| h_Slc25a25  | 1   | MLCLCLYVPVIGEAQTEFQYFESKGLPAELKSI FKLSVFI PSQEFSTYRQWKQKIVQAGD                                                          |
| zf_Slc25a25 | 1   | MLCLCLYVPVHNSDQIEVEYFESNGLPSELKSLKSLSVLLPSQEFSTYRRWRKKSILKTEE                                                           |
| h_Slc25a25  | 61  | KDL D G Q L D F E E F V H Y L Q D H E K K L R L V F K S L D K K N D G R I D A Q E I M Q S L R D L G V K I S E Q Q A E   |
| zf_Slc25a25 | 61  | K E H D G Q L D F E E F V H Y L Q D H E K D L K L V F K S M D R K I A G Q V N A N D I V N S L R D L G V H I S L K Q A E |
| h_Slc25a25  | 121 | K I L K S M D K N G T M T I D W N E W R D Y H L L H P V E N I P E I I L Y W K H S T I F D V G E N L T V P D E F T V E E |
| zf_Slc25a25 | 121 | K V L K S M D K N G T M T I D W N E W K K Y P T L Q P A E N I P E I I L Y W K H S T I F D V G E S L M V P D E F T V E E |
| h_Slc25a25  | 181 | R Q T G M W W R H L V A G G G A G A V S R T C T A P L D R L K V L M Q V H A S R S N N M G I V G G F T Q M I R E G G A R |
| zf_Slc25a25 | 181 | H L T G M W W R H L V S G G G A G A V S R T C T A P L D R L K V L M Q V H G C Q G K S M C L M S G L T Q M I K E G G V R |
| h_Slc25a25  | 241 | S L W R G N G I N V L K I A P E S A I K F M A Y E Q I K R L V G S D Q E T L R I H E R L V A G S L A G A I A Q S S I Y P |
| zf_Slc25a25 | 241 | S L W R G N G I N V I K I A P E T A L K F M A Y E Q I K R V M G S S Q E T L G I S E R F V A G S L A G V I A Q S T I Y P |
| h_Slc25a25  | 301 | M E V L K T R M A L R K T G Q Y S G M L D C A R R I L A R E G V A A F Y K G Y V P N M L G I I P Y A G I D L A V Y E T L |
| zf_Slc25a25 | 301 | M E V L K T R L A L R K T G Q Y K G I S D C A K H I L K T E G M S A F Y K G Y V P N M L G I I P Y A G I D L A V Y E T L |
| h_Slc25a25  | 361 | K N A W L Q H Y A V N S A D P G V F V L L A C G T M S S T C G Q L A S Y P L A L V R T R M Q A Q A S I E G A P E V T M S |
| zf_Slc25a25 | 361 | K N T W L Q R Y G T E N A D P G V F V L L A C G T V S S T C G Q L A S Y P L A L I R T R M Q A Q A S V E G S S Q V S M T |
| h_Slc25a25  | 421 | S L F K H I L R T E G A F G L Y R G L A P N F M K V I P A V S I S Y V V Y E N L K I T L G V Q S R                       |
| zf_Slc25a25 | 421 | G L F K Q I M K T E G P T G L Y R G L T P N F L K V I P A V S I S Y V V Y E H I K S T L G V R S R                       |

```

h_Trpc1      1  -----
zf_Trpc1     1  MGISEEEWERLQKALEWPSPDQEITELSESTSPDHSTFTIVGLNQNSVGEKILVTITSR

h_Trpc1      1  -----
zf_Trpc1    61  DHNNKLKRYGGDFFKVLFNSELKASVYGEVVDHRNGTYSASLLLPWEGQAQVSVRLEHS

h_Trpc1      1  -----
zf_Trpc1   121  SEVVQILKKYRESSFTRSHYNGHFEGPGPNKTRISEVVPCNLKWGGNGSWIKGNCCCEYK

h_Trpc1      1  -----
zf_Trpc1   181  DIKTGTVWHCIKRMDLHTPPTGGPLMAVELTNNIIVHWGPHGVPLRFTKMLITDLHYISN

h_Trpc1      1  -----
zf_Trpc1   241  DIDEIAGGSHAVIVFTIAAHLVFHPLTFYVHEVAKIRQSVVSLLSRAPETLVIKSGNTA

h_Trpc1      1  -----MMAALYPSTD-----LSGASS
zf_Trpc1   301  GQKDI FQSDWYAMQLNTVMQEMFRDIDAVIYFDVWQMTSCHYLDHDDVHPGCKALLSGMHI

h_Trpc1      17  SSLPSSP-----SSSSPNEVMALKDREVKEENTLNEKLFLLACDKGDYYMVKK
zf_Trpc1   361  SALPYSLSVIMAALYQGTDSSSSPDKYLALKDREVKEETTLDEKLFLLACEKGDYYMVKK

h_Trpc1      66  ILEENSSGDLNINCVDVLGRNAVITITIEENENLDILQLLLDYGQCQLMERIQNPEYSTTMD
zf_Trpc1   421  LLEEKRHGELNINCVDVLGRDAVTISIEENENLDILQLLLDHGCQKLIQKIQNPEYSTTMD

h_Trpc1     126  VAPVILAAHRNNYEILTMLLKQDVSLPKPHAVGCECTLCSAKNKKDSLRSRFRLDIYRC
zf_Trpc1   481  VAPVILAAHRNNYEILTMLLKQDISLPRPHAVGCECTLCNAKNKKDSLRSRFRLDIYRC

h_Trpc1     186  LASPALIMLTEEDPILRAFELSADLKELSLVEVEFRNDYEELARQCKMFAKDLLAQARNS
zf_Trpc1   541  LASPALIMLTEEDPILRAFELSADLKELSLVEVEFRNDYEELAKQCKMFAKDLLAQARNS

h_Trpc1     246  RELEVILNHTSSDEPLDKRGLLEERMNLSRLKLAIKYNQKEFVSQSNCQQFLNTVWFGQM
zf_Trpc1   601  RELEVILNHTSSDHVVDKRGLLEERMNLSRLKLAIKYNQKEFVAQSNCQQFLNTVWFGEM

h_Trpc1     306  SGYRRKPTCKKIMTVLTVGIFWPVLSLCYLIAPKSQFGRIIHTPFMKFIIHGASYFTFLL
zf_Trpc1   661  ASYRRKHTCLKIVSVLSVALLWPLLSICYLLGPRSRVGVIIHTPFIKFIIHSASYFTFLL

h_Trpc1     366  LLNLYSLVYNE-DKKN-TMGPALERIDYLLILWIIIGMIWSDIKRLWYEGLEDFLEESRNQLS
zf_Trpc1   721  LLNLYSLIYN-DKKN-MAPALQFIDYLLILWIIIGMVWSDVKRLWYEGLEDFLEESRNQLS

h_Trpc1     426  FVMNSLYLATFALKVVAHNKFDHDFAD---RKDWDAFHPTLVAEGLFAFANVLSYLRLFFM
zf_Trpc1   779  FVMNSLYLATFALKIVAHNKYSKIIKPEERKEWDAFHPTLVAEGLFAFAIVLSYLRLFFM

```

```

h_Trpc1 483 YTTSSILGPLQISMGQMLQDFGKFLGMFLLVLFSTIGLTQLYDKG----YTSKEQKDCV
zf_Trpc1 839 YTTSSILGPLQISMGQMLQDFGKFLGIFLLVLIISFTIGLTQLYGKDQDPSKTKDDNKDCE

h_Trpc1 539 GIFCEQQSNDTFHSFIGTCFALFWYIFSLAHVAIFVTRFSYGEELQSFVGAVIVGTYNVV
zf_Trpc1 899 GIYCQQQSNDTFHTFMGTCYALFWYIFSLAHVNLFVTRISYTEELRSFVGALIVGTYNIV

h_Trpc1 599 VVIVLTKLLVAMLHKSFLIANHEDKEWKFARAKLWLSYFDDKCTLPPPFNIIPSPKTIIC
zf_Trpc1 959 VVIVLTKLLVAMLHKSFRQIANHEDKEWKFARAKLWLSYFDDKCTLPPPFNVLPSPKTVIC

h_Trpc1 659 YMISLSKWCISHTSKGKVKRQNSLKEWRNLKQKRDENYQKVMCCLVHRYLTSMRQKMQS
zf_Trpc1 1019 YLVISMKWCISHTSTGKVKRQNSLREWTNLKQKRDNQYQKIMCCLVHRYLTSTRQKMQS

h_Trpc1 719 TDQATVENLNELRQDLSKFRNEIRDLLGFRTSKYAMFYPRN
zf_Trpc1 1079 MDQATVENLNDLRQDLSKFRNEMRDLLGFRTSKYAMFYPRS

```

h\_Trpc5 1 ---MAQLYYKKVNYSPYRDRIPLQIVRAETELSAEEKAFLNAVEKGDYATVKQALQEAEI  
 zf\_Trpc5 1 MNPMSHLYYKKSSYSPYRDRIPLQIVRAEVELSPEERAFLSAVEKGDYAGVQHALLREAEV

h\_Trpc5 58 YYNVNINCM DPLGRSALLIAIENENLEIMELLNHSVYVGDALLYAIRKEVVGAVELLLS  
 zf\_Trpc5 61 YYNIDTNCVDPLGRSALLIAIENENLEVMELLLDHGVNTGDALLYAIRKEVVGAVELLLS

h\_Trpc5 118 YRRPSGEEKQVPTLMMDTQFSEFTPDITPIMLAAHTNNEYI IKLLVQKRV TIPRPHQIRCN  
 zf\_Trpc5 121 HRKPSGEEKQVPSLMDAQFSEFTPDITPIMLAAHTNNEYI IKLLVQKRV TIPRPHQIRCD

h\_Trpc5 178 CVECVSSEVDSL RHSRSLNIYKALASPSLIALSSEDPI LTA FRLGWELKELSKVENE F  
 zf\_Trpc5 181 CVECVSSEVDSL RHSRSLNIYKALASPSLIALSSEDPI LTA FRLGWELKELSKVENE F

h\_Trpc5 238 KAEYEELSQQCKLFAKDLLDQARSSRELEI ILNHRDDHSEELDPQKYHDLAKLKVAIKYH  
 zf\_Trpc5 241 RQEYEELSQQCKLFAKDLLDQARSSRELET ILNHRDDQSEELDPRECRDLAKLKLAIKYH

h\_Trpc5 298 QKEFVAQPNCQQLLATLWYDGFPGWRRKHWVVKLLITCMTIGFLFPMLSIAYLISPRSNLG  
 zf\_Trpc5 301 QKEFVAQPNCQQLLATLWYDGFPGWRRRHWA VKLVMCFIIGLLFPVFSLVYLLAPKSTLIG

h\_Trpc5 358 LFIKKPFIKFIHTASYLTFLFMLLLASQHI VRTDLHVQGGPPTVVEWMILPWVLGFIWG  
 zf\_Trpc5 361 LFIKKPFIKFIHTASYLTFLFLLLLASQHIARTNLHMGGPPTVVEWMILPWVLGFIWA

h\_Trpc5 418 EIKEMWDGGFTEYIHDWWNLMDFAMNSLYLATISLKIVAYVKYNGSRPREEWEMWHPTLI  
 zf\_Trpc5 421 EIKEMWDGGFNEYVHDWWNLMDFAMNSLYLATISLKIVAYVKYNSSRPREEWEMWHPTLI

h\_Trpc5 478 AEALFAISNILSSLRLISLFTANSHLGPLQISLGRMLLDILKFLFIYCLVLLAFANGLNQ  
 zf\_Trpc5 481 AEALFAIANIFSSLRLISLFTANSHLGPLQISLGRMLLDILKFLFIYCLVLLAFANGLNQ

h\_Trpc5 538 LYFYYETRAIDE PNNCKGIRCEKQNNAFSTLFETLQSLFWSVFGLLNLYVTNVKARHEFT  
 zf\_Trpc5 541 LYFYYETEAADEPNHCKGIRCERQNNAFST-----

h\_Trpc5 598 EFGVATMFGTYNVISLVLLNMLIAMMNSYQLIADHADIEWK FARTKLWMSYFDEGGTL  
 zf\_Trpc5 -----

h\_Trpc5 658 PPPFNII PPKSFLYLGNWFNNTFCPKRDPDGRRRRRNLRSFTERNADSLIQNHYQEV I  
 zf\_Trpc5 -----

h\_Trpc5 718 RNLVKRYVAAMIRNSKTHEGLTEENFKELKQDISSFRYEVLDLLGNRKHPRS FSTSSTEL  
 zf\_Trpc5 -----

h\_Trpc5 778 SQRDDNNDGSGGARAKSKSVSNL GCKKKTCHGPPLIRTMPRSSGAQGKSKAESSKR SF  
 zf\_Trpc5 -----

h\_Trpc5 838 MGPSLKKLGLLFSKFNHMHSEPSSEPMTTISDGIVQQHCMWQDIRYSQMEKGKAEACSQS  
zf\_Trpc5 -----

h\_Trpc5 898 EINLSEVELGEVQGAAQSSECLACSSSLHCASSICSSNSKLLDSSDVFETWGEACDLL  
zf\_Trpc5 -----

h\_Trpc5 958 MHKWGDGQEEQVTTRL  
zf\_Trpc5 -----

```
h_Vamp2      1 MSATAATAPPAAPAGEGGPPAPPNLTSNRRLQQTQAQVDEVVDIMRVNVDKVLERDQKL
zf_Vamp2     1 -----MSAPAGAPAPEGGNQAPP-NLTSNRRLQQTQAQVDEVVDIMRVNVDKVLERDQKL

h_Vamp2      61 SELDDRADALQAGASQFETSAAKLKRKYWWKNLKMMIILGVICAIILIIIIIVYFST
zf_Vamp2     55 SELDDRADALQAGASQFETSAAKLKNKYWWKNAKMMIILGVICVIVLIIIIIVYFST
```
