# Supplementary material for: Proteomic and functional analysis of NCS-1 binding proteins reveals novel signaling pathways required for inner ear development in zebrafish
Source: PubMed Central journal article supplement (PMC2679751; doi:10.1186/1471-2202-10-27), 2009-03-25

## EXOCYTOSIS

24 hpf

48 hpf

72 hpf

*arf1*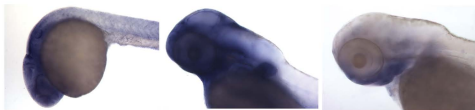*pi4kβ*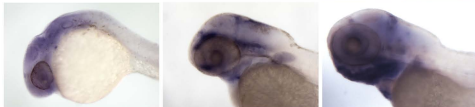*vamp2*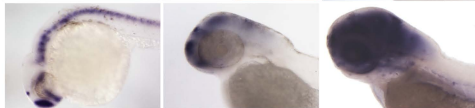

## MITOCHONDRIAL

24 hpf

48 hpf

72 hpf

*slc25a25*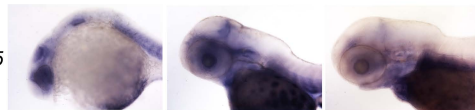*pink1*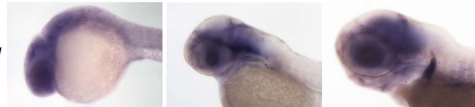*hint2*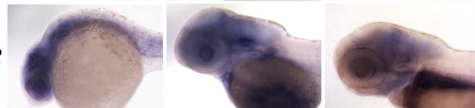

## CALCIUM CHANNELS

24 hpf

48 hpf

72 hpf

*trpc1*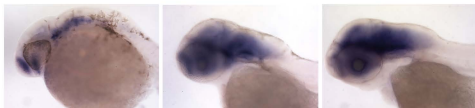*trpc5*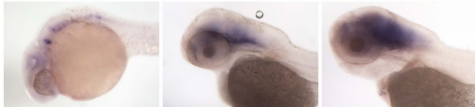*ip3r*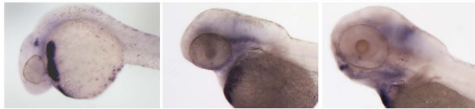

## BMP SIGNALING

24 hpf

48 hpf

72 hpf

*dan*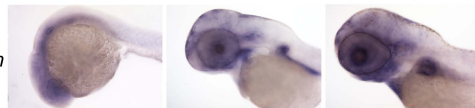

Supplement: 1471-2202-10-27-S2.pdf [file 1471-2202-10-27-S2.pdf]
